# Supplementary material for: Trimetallic-organic framework/MXene composite as an oxygen evolution reaction electrocatalyst with elevated intrinsic activity
Source: Royal Society of Chemistry journal article supplement (doi:10.1039/d4ta00131a), 2024-01-01
Supplement: d4ta00131a1.pdf [file d4ta00131a1.pdf]

## Supporting Information

### Trimetallic-Organic Framework/ MXene Composite as an Oxygen Evolution Reaction Electrocatalyst with Elevated Intrinsic Activity

Mahrokh Nazari<sup>†</sup>, Ali Morsali<sup>†\*</sup>

<sup>†</sup>Department of Chemistry, Faculty of Basic Sciences, Tarbiat Modares University, Tehran 14117-13116, P.O. Box 14115-175, Iran; <https://orcid.org/0000-0002-1828-7287>

Email: morsali\_a@modares.ac.ir

## 1. FESEM and TEM images of FeNiCo-MIL/Ti<sub>3</sub>C<sub>2</sub> composite

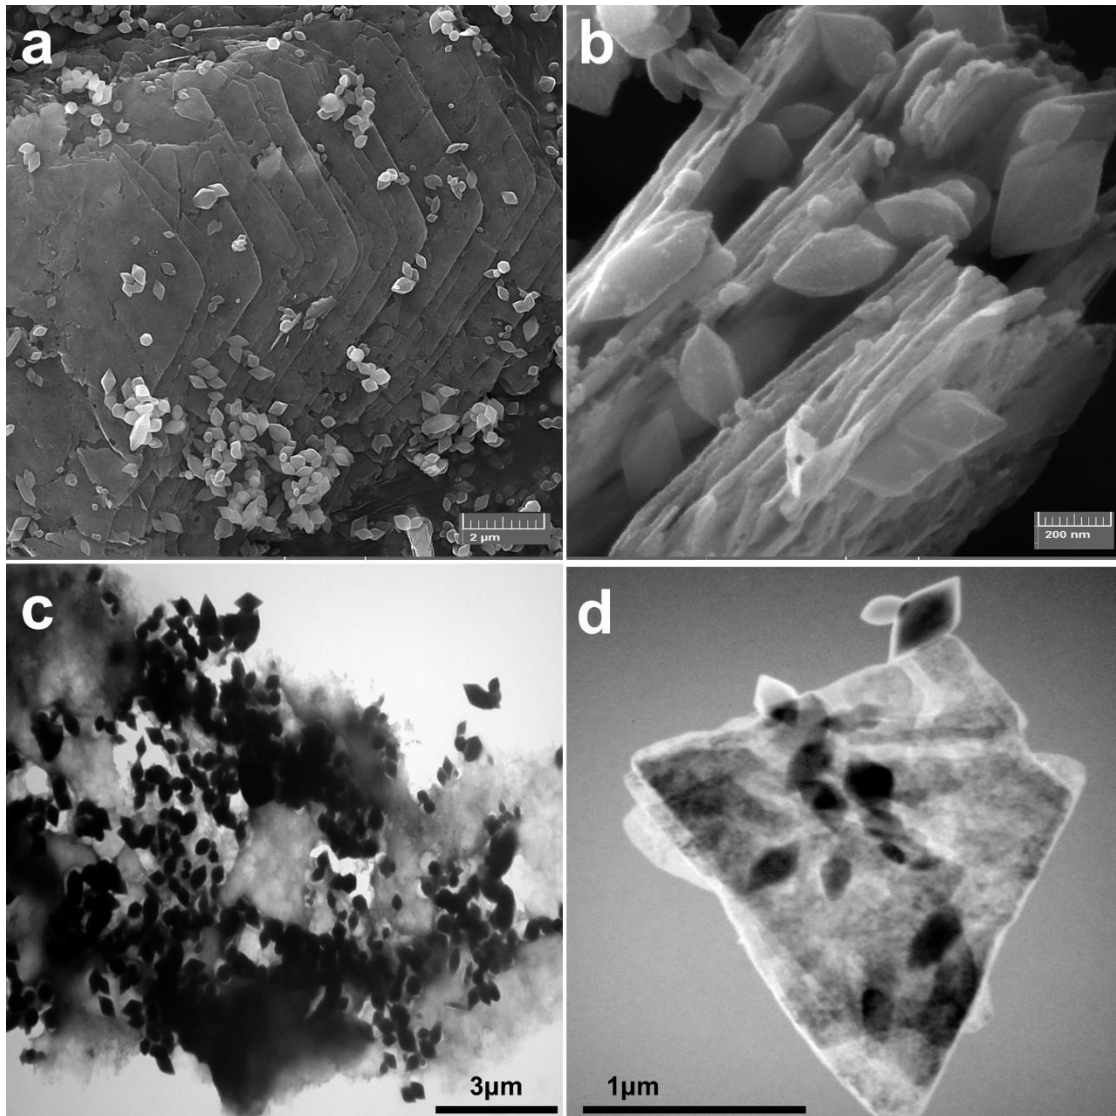

**Figure S 1.** (a and b) FESEM image of FeNiCo-MIL/Ti<sub>3</sub>C<sub>2</sub> composite from top and side view, (c and d) TEM and dark field TEM images of FeNiCo-MIL/Ti<sub>3</sub>C<sub>2</sub> in different magnifications respectively.

## 2. EDX and elemental mapping

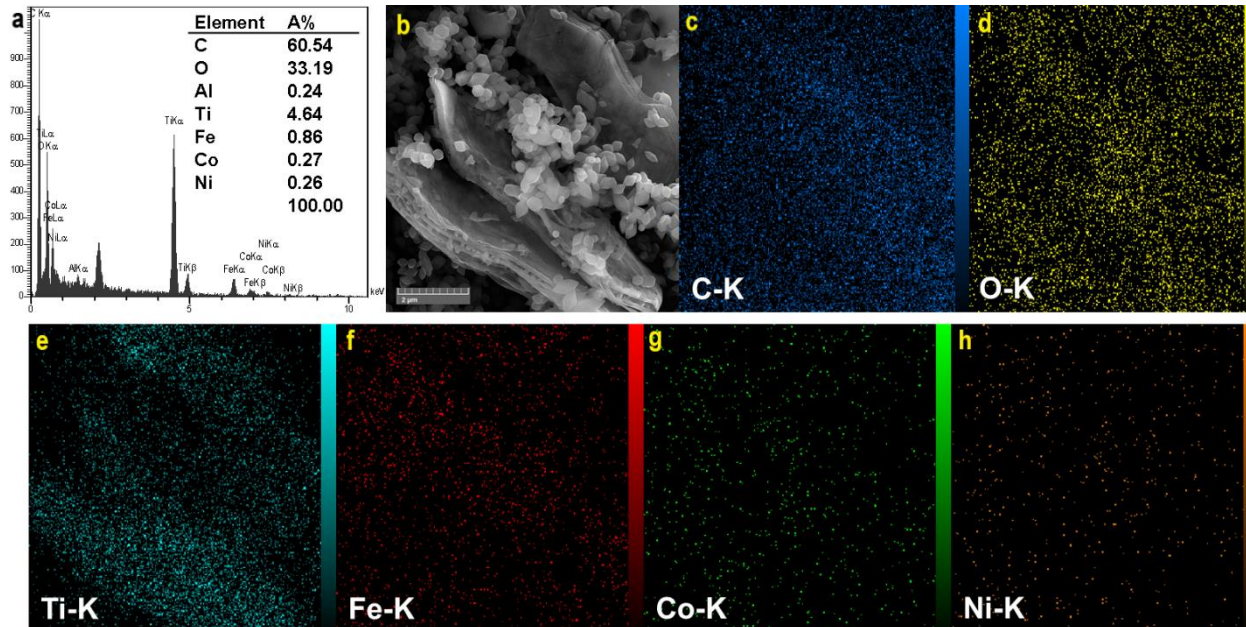

**Figure S 2.** EDS spectrum and elemental mapping of FeNiCo-MIL/Ti<sub>3</sub>C<sub>2</sub> composite. (a) EDS spectrum of the FeNiCo-MIL/Ti<sub>3</sub>C<sub>2</sub> composite, (b) FE-SEM image and (c-) EDS elemental mappings of carbon, oxygen, titanium, iron, cobalt and nickel elements of the FeNiCo-MIL/Ti<sub>3</sub>C<sub>2</sub> composite.

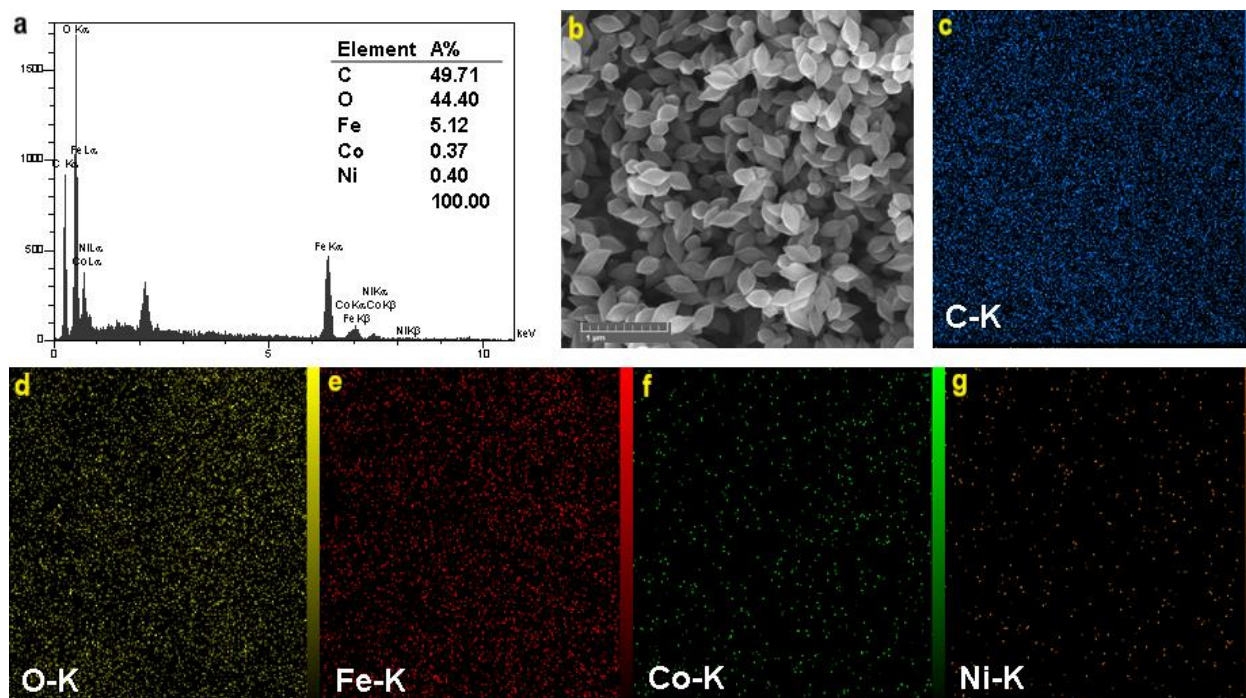

**Figure S 3.** EDS spectrum and elemental mapping of FeNiCo-MIL. (a) EDS spectrum of the FeNiCo-MIL, (b) FE-SEM image and (c-g) EDS elemental mappings of carbon, oxygen, iron, cobalt and nickel elements of the FeNiCo-MIL.

### 3. FT-IR analysis.

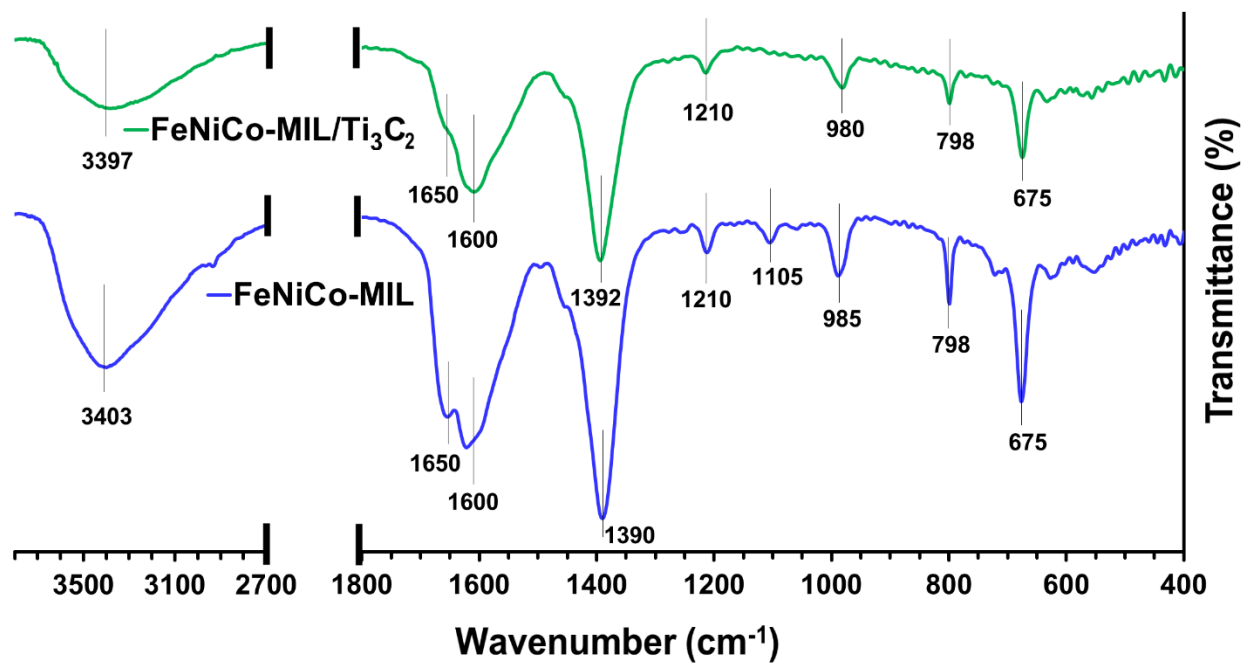

*Figure S 4. FT-IR spectra of the FeNiCo-MIL (blue), and FeNiCo-MIL/ $\text{Ti}_3\text{C}_2$  composite (green).*

#### 4. ECSA measurement.

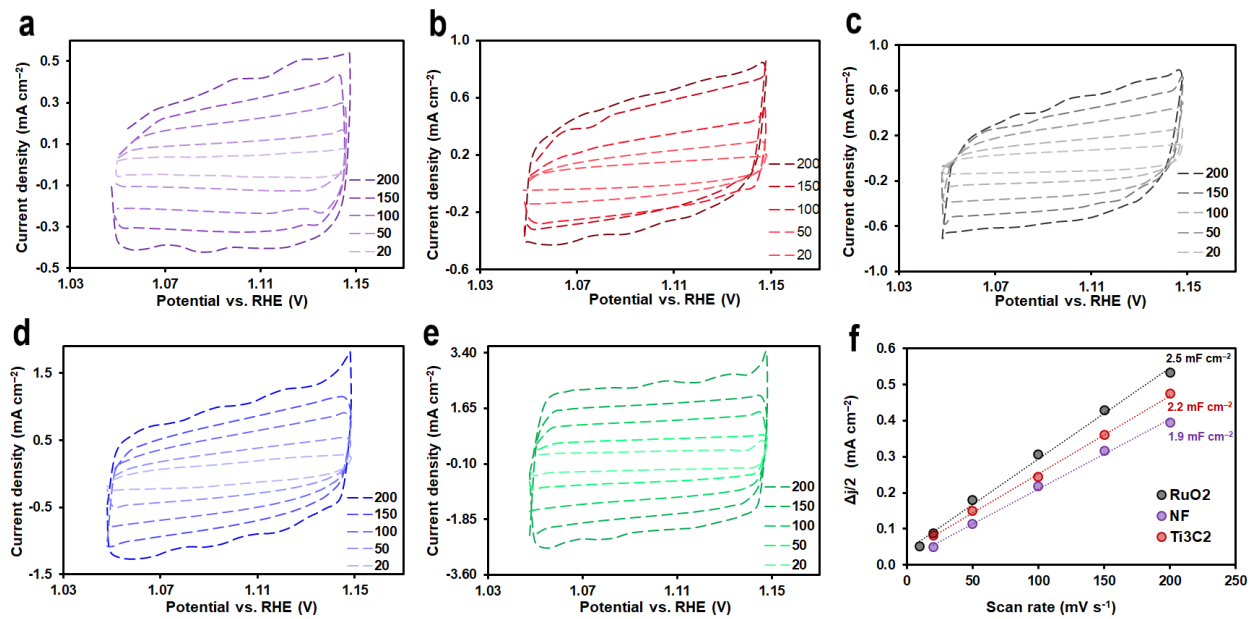

**Figure S 5. Estimation of the ECSA.** CV curves of (a) NF, (b) Ti<sub>3</sub>C<sub>2</sub>, (c) RuO<sub>2</sub>, (d) FeNiCo-MIL, and (e) FeNiCo-MIL/Ti<sub>3</sub>C<sub>2</sub>, in the non-Faradaic potential window at different scan rates from 20-200 mV s<sup>-1</sup> and (f)  $C_{dl}$  estimated from the plot of capacitive currents at the middle of the potential window versus scan rate.

## 5. Stability investigation of RuO<sub>2</sub> electrocatalyst

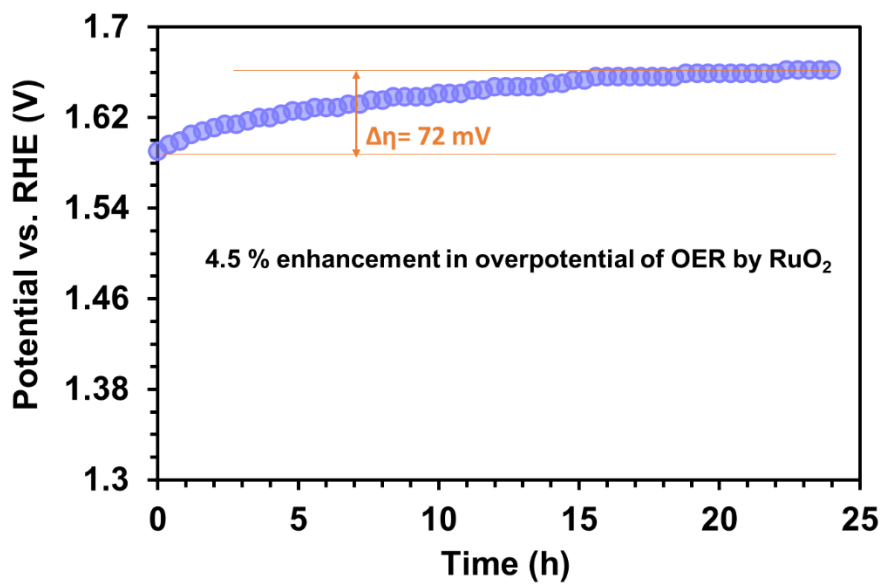

*Figure S 6.* Chronopotentiometry plot at the current density of  $10 \text{ mA cm}^{-2}$  for 24 h.

## 6. XPS Analysis of FeNiCo-MIL/Ti<sub>3</sub>C<sub>2</sub> electrode after stability test.

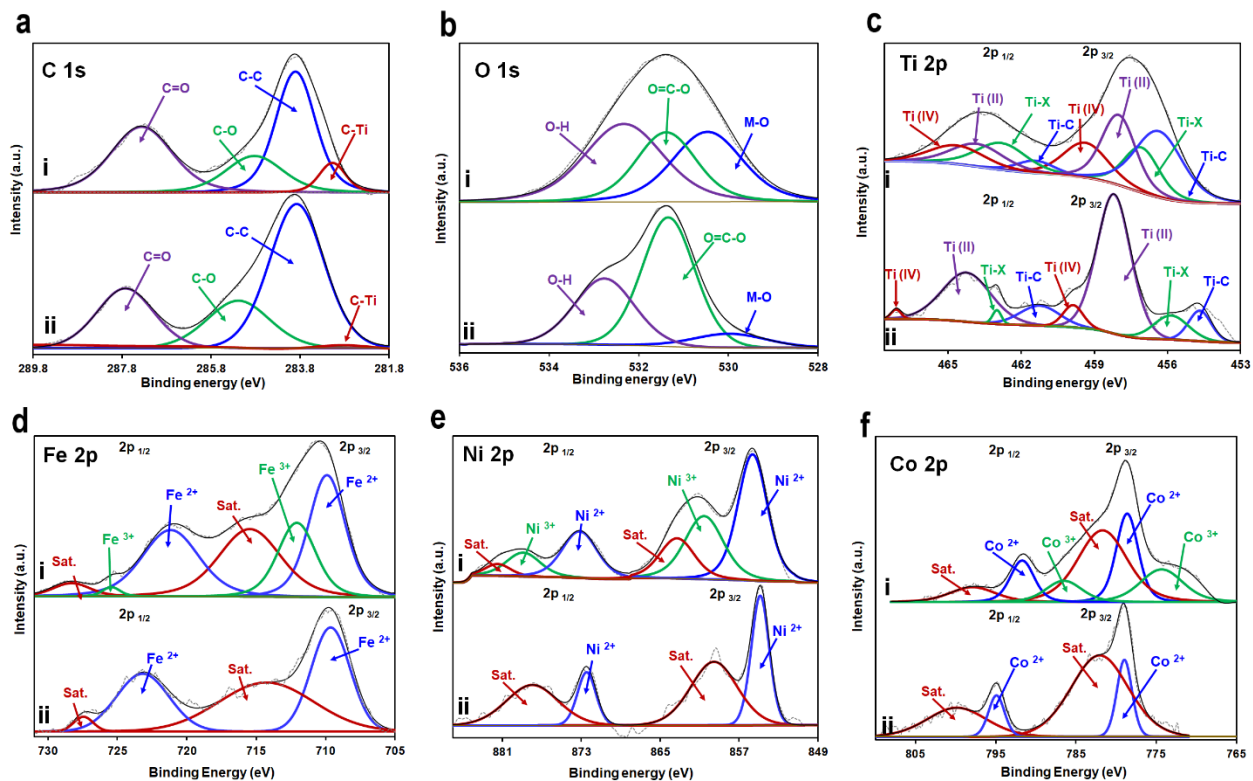

**Figure S 7.** Deconvoluted core-level XPS spectrum of the FeNiCo-MIL/Ti<sub>3</sub>C<sub>2</sub> composite, (i) after 24 h chronopotentiometry test at current density of 10 mA cm<sup>-2</sup> and (ii) As-prepared; (a) C 1s, (b) O 1s, (c) Ti 2p, (d) Fe 2p, (e) Ni 2p and (f) Co 2p.

## 7. Calculation of the TOF

The surface concentration of metal atoms at the FeNiCo-MIL/Ti<sub>3</sub>C<sub>2</sub> electrode was calculated from the redox peak from the LSV.<sup>1</sup>

Area from redox peak of FeNiCo-MIL is =  $13.17 \times 10^{-3}$  Coulombs

Then, no. of electrons =  $13.17 \times 10^{-3} \text{ C} / 1.602 \times 10^{-19} \text{ C} = 8.85 \times 10^{16}$

Now, divide by the number of e-transferred in the redox reaction which is 1 here.

=  $8.85 \times 10^{16} / 1 = 8.85 \times 10^{16}$  atoms

Then TOF calculated as below,

$$TOF = \frac{i \times N_A}{A \times F \times n \times \Gamma}$$

where  $i$  is the current (A) at the given overpotential,  $N_A$  is the Avogadro number ( $6.023 \times 10^{23}$ ),  $A$  is the geometrical surface area of the electrode ( $\text{cm}^2$ ),  $F$  is the Faraday constant ( $96,485 \text{ C mol}^{-1}$ ),  $n$  is number of electrons and  $\Gamma$  is surface concentration. We have taken the OER current of  $37 \text{ mA cm}^{-2}$  observed at  $1.49 \text{ V vs. RHE}$ , and  $132 \text{ mA cm}^{-2}$  observed at  $1.56 \text{ V vs. RHE}$  with the loaded catalyst to calculate  $TOF_{\text{max}}$ . Hence we have,

$$TOF_{1.49 \text{ V}} = \frac{[(37 \times 10^{-3})(6.023 \times 10^{23})]}{[(1)(96485)(4)(8.85 \times 10^{16})]} = 0.65 \text{ s}^{-1}$$

$$TOF_{1.56 \text{ V}} = \frac{[(132 \times 10^{-3})(6.023 \times 10^{23})]}{[(1)(96485)(4)(8.85 \times 10^{16})]} = 2.33 \text{ s}^{-1}$$



**Table S 1.** A comparison of FeNiCo-MIL/Ti<sub>3</sub>C<sub>2</sub> electrocatalyst with recently reported catalysts in OER performance.

| Catalyst                                                                | Electrolyte | $\eta_{j=10}$<br>(mV) | Tafel<br>slope<br>(mV<br>dec <sup>-1</sup> ) | TOF<br>(s <sup>-1</sup> ) | Reference |
|-------------------------------------------------------------------------|-------------|-----------------------|----------------------------------------------|---------------------------|-----------|
| Ni-BDC/NF                                                               | 1 M KOH     | 289                   | 154.5                                        | -                         | 2         |
| HZIF-2-CoMo                                                             | 1 M KOH     | 277                   | 70                                           | 0.01                      | 3         |
| Fe <sub>2.1</sub> Ni <sub>0.2</sub> Co <sub>0.7</sub> -MIL              | 1 M KOH     | 282                   | 51                                           | -                         | 4         |
| Fe <sub>2</sub> Ni MIL-88                                               | 1 M KOH     | 246                   | 62                                           | -                         | 5         |
| NiSe <sub>2</sub> -FeSe DHPs                                            | 1 M KOH     | 280                   | 58                                           | 0.044 @ $\eta_{280}$ mV   | 6         |
| Fe <sub>x</sub> Ni <sub>y</sub> -BDC                                    | 1 M KOH     | 260                   | 35                                           | 0.36 @ $\eta_{330}$ mV    | 7         |
| Ti <sub>3</sub> C <sub>2</sub> T <sub>x</sub> -CoBDC                    | 0.1 M KOH   | 410                   | 48.2                                         | -                         | 8         |
| CoFe-MOF                                                                | 1 M KOH     | 265                   | 44                                           | 0.4 @ $\eta_{400}$ mV     | 9         |
| FeCo-LDH/MXene                                                          | 1 M KOH     | 268                   | 85                                           | 0.106 @ $\eta_{400}$ mV   | 10        |
| S-NiFe <sub>2</sub> O <sub>4</sub> @ Ti <sub>3</sub> C <sub>2</sub> @NF | 1 M KOH     | 270                   | 46.8                                         | -                         | 11        |
| NiFeP/MXene                                                             | 1 M KOH     | 286                   | 35                                           | 0.35 @ $\eta_{300}$ mV    | 12        |
| Co-Bi/ Ti <sub>3</sub> C <sub>2</sub> T <sub>x</sub>                    | 1 M KOH     | 250                   | 53                                           | -                         | 13        |
| Co/N-CNTs@ Ti <sub>3</sub> C <sub>2</sub> T <sub>x</sub>                | 1 M KOH     | 411                   | 79.1                                         | -                         | 14        |
| NiCoFe-HO@NiCo-LDH YSMRs                                                | 1 M KOH     | 278                   | 49.7                                         | 0.051 @ $\eta_{278}$ mV   | 15        |
| S/N-CMF@Fe <sub>x</sub> Co <sub>y</sub> Ni <sub>1-x-y</sub> -MOF        | 1 M KOH     | 296                   | 53.5                                         | 0.124 @ $\eta_{300}$ mV   | 16        |
| NiCo <sub>2x</sub> Fe <sub>x</sub> O <sub>4</sub> NBs                   | 1 M KOH     | 274                   | 42                                           | 0.016 @ $\eta_{300}$ mV   | 17        |
| ZnCoFe-N-C                                                              | 1 M KOH     | 370                   | 82.9                                         | -                         | 18        |
| FeCoNi-PBA                                                              | 1 M KOH     | 236                   | 43.8                                         | 0.136 @ $\eta_{320}$ mV   | 19        |
| t-NiCoFe-LDH                                                            | 1 M KOH     | 277                   | 68.83                                        | -                         | 20        |
| MXene@RuCo NPs                                                          | 1 M KOH     | 253                   | 61.4                                         | 0.0113                    | 21        |
| NiFeCoP/Mxene                                                           | 1 M KOH     | 240                   | 55                                           | -                         | 22        |
| CoNi MOF-mCNTs                                                          | 1 M KOH     | 306                   | 42                                           | -                         | 23        |
| Ru-CoN/Ti <sub>3</sub> C <sub>2</sub> T <sub>x</sub>                    | 1 M KOH     | 290                   | 68                                           | -                         | 24        |
| FeOOH NSs/ Ti <sub>3</sub> C <sub>2</sub>                               | 1 M KOH     | 400                   | 95                                           | -                         | 25        |
| FeNiCo-MIL                                                              | 1 M KOH     | 260                   | 42.9                                         | 0.71 @ $\eta_{270}$ mV    | This work |
| FeNiCo-MIL/Ti <sub>3</sub> C <sub>2</sub>                               | 1 M KOH     | 231                   | 34.5                                         | 2.33 @ $\eta_{270}$ mV    | This work |

\* Note that, studies shows electrocatalyst activities will always depend greatly on intrinsic activities, therefore TOF is a reliable parameter, but still most researchers employ the overpotential at 10 mA cm<sup>-2</sup> and Tafel slope parameters which are actually mass dependent and are not very proper criteria for comparison.<sup>26</sup>

**Table S 2.** The values of the Equivalent Series Resistance and Charge Transfer Resistance for the FeNiCo-MIL/Ti<sub>3</sub>C<sub>2</sub>, FeNiCo-MIL and Ti<sub>3</sub>C<sub>2</sub> electrodes.

| Catalyst                                  | ESR ( $\Omega$ ) | R <sub>ct</sub> ( $\Omega$ ) |
|-------------------------------------------|------------------|------------------------------|
| NF                                        | 0.51             | 29.0                         |
| RuO <sub>2</sub>                          | 0.34             | 34.0                         |
| Ti <sub>3</sub> C <sub>2</sub>            | 0.206            | 27.5                         |
| FeNiCo-MIL                                | 0.404            | 0.92                         |
| FeNiCo-MIL/Ti <sub>3</sub> C <sub>2</sub> | 0.323            | 0.46                         |

## References.

- (1) Anantharaj, S.; Karthik, P. E.; Kundu, S. Petal-like hierarchical array of ultrathin Ni(OH)<sub>2</sub> nanosheets decorated with Ni(OH)<sub>2</sub> nanoburls: a highly efficient OER electrocatalyst. *Catalysis Science & Technology* **2017**, *7* (4), 882-893. DOI: 10.1039/C6CY02282K. DOI: 10.1039/c6cy02282k.
- (2) Qiang, C.; Liu, M.; Zhang, L.; Chen, Z.; Fang, Z. In Situ Growth of Ni-Based Metal–Organic Framework Nanosheets on Carbon Nanotube Films for Efficient Oxygen Evolution Reaction. *Inorganic Chemistry* **2021**, *60* (5), 3439-3446. DOI: 10.1021/acs.inorgchem.1c00026.
- (3) Muthurasu, A.; Dahal, B.; Chhetri, K.; Kim, H. Y. Vertically Aligned Metal–Organic Framework Derived from Sacrificial Cobalt Nanowire Template Interconnected with Nickel Foam Supported Selenite Network as an Integrated 3D Electrode for Overall Water Splitting. *Inorganic Chemistry* **2020**, *59* (6), 3817-3827. DOI: 10.1021/acs.inorgchem.9b03466.
- (4) Li, F.; Tian, Y.; Su, S.; Wang, C.; Li, D.-S.; Cai, D.; Zhang, S. Theoretical and experimental exploration of tri-metallic organic frameworks (t-MOFs) for efficient electrocatalytic oxygen evolution reaction. *Applied Catalysis B: Environmental* **2021**, *299*, 120665. DOI: <https://doi.org/10.1016/j.apcatb.2021.120665>.
- (5) Abazari, R.; Sanati, S.; Morsali, A. Mixed Metal Fe<sub>2</sub>Ni MIL-88B Metal–Organic Frameworks Decorated on Reduced Graphene Oxide as a Robust and Highly Efficient Electrocatalyst for Alkaline Water Oxidation. *Inorganic Chemistry* **2022**, *61* (8), 3396-3405. DOI: 10.1021/acs.inorgchem.1c03216.
- (6) Ramesh, S. K.; Ganesan, V.; Kim, J. NiSe<sub>2</sub>–FeSe Double-Shelled Hollow Polyhedrons as Superior Electrocatalysts for the Oxygen Evolution Reaction. *ACS Applied Energy Materials* **2021**, *4* (11), 12998-13005. DOI: 10.1021/acsaem.1c02634.
- (7) Li, J.; Huang, W.; Wang, M.; Xi, S.; Meng, J.; Zhao, K.; Jin, J.; Xu, W.; Wang, Z.; Liu, X.; et al. Low-Crystalline Bimetallic Metal–Organic Framework Electrocatalysts with Rich Active Sites for Oxygen Evolution. *ACS Energy Letters* **2019**, *4* (1), 285-292. DOI: 10.1021/acsenergylett.8b02345.
- (8) Zhao, L.; Dong, B.; Li, S.; Zhou, L.; Lai, L.; Wang, Z.; Zhao, S.; Han, M.; Gao, K.; Lu, M.; et al. Interdiffusion Reaction-Assisted Hybridization of Two-Dimensional Metal–Organic Frameworks and Ti<sub>3</sub>C<sub>2</sub>T<sub>x</sub> Nanosheets for Electrocatalytic Oxygen Evolution. *ACS Nano* **2017**, *11* (6), 5800-5807. DOI: 10.1021/acsnano.7b01409.
- (9) Zou, Z.; Wang, T.; Zhao, X.; Jiang, W.-J.; Pan, H.; Gao, D.; Xu, C. Expediting in-Situ Electrochemical Activation of Two-Dimensional Metal–Organic Frameworks for Enhanced OER Intrinsic Activity by Iron Incorporation. *ACS Catalysis* **2019**, *9* (8), 7356-7364. DOI: 10.1021/acscatal.9b00072.
- (10) Tian, M.; Jiang, Y.; Tong, H.; Xu, Y.; Xia, L. MXene-Supported FeCo-LDHs as Highly Efficient Catalysts for Enhanced Electrocatalytic Oxygen Evolution Reaction. *ChemNanoMat* **2020**, *6* (1), 154-159. DOI: <https://doi.org/10.1002/cnma.201900613>.
- (11) Tang, Y.; Yang, C.; Yang, Y.; Yin, X.; Que, W.; Zhu, J. Three dimensional hierarchical network structure of S-NiFe<sub>2</sub>O<sub>4</sub> modified few-layer titanium carbides (MXene) flakes on nickel foam as a high efficient electrocatalyst for oxygen evolution. *Electrochimica Acta* **2019**, *296*, 762-770. DOI: <https://doi.org/10.1016/j.electacta.2018.11.083>.
- (12) Chen, J.; Long, Q.; Xiao, K.; Ouyang, T.; Li, N.; Ye, S.; Liu, Z.-Q. Vertically-interlaced NiFeP/MXene electrocatalyst with tunable electronic structure for high-efficiency oxygen evolution reaction. *Science Bulletin* **2021**, *66* (11), 1063-1072. DOI: <https://doi.org/10.1016/j.scib.2021.02.033>.
- (13) Liu, J.; Chen, T.; Juan, P.; Peng, W.; Li, Y.; Zhang, F.; Fan, X. Hierarchical Cobalt Borate/MXenes Hybrid with Extraordinary Electrocatalytic Performance in Oxygen Evolution Reaction. *ChemSusChem* **2018**, *11* (21), 3758-3765. DOI: <https://doi.org/10.1002/cssc.201802098>.
- (14) Zhang, Y.; Jiang, H.; Lin, Y.; Liu, H.; He, Q.; Wu, C.; Duan, T.; Song, L. In Situ Growth of Cobalt Nanoparticles Encapsulated Nitrogen-Doped Carbon Nanotubes among Ti<sub>3</sub>C<sub>2</sub>T<sub>x</sub> (MXene) Matrix for Oxygen Reduction and Evolution. *Advanced Materials Interfaces* **2018**, *5* (16), 1800392. DOI: <https://doi.org/10.1002/admi.201800392>.
- (15) Niu, Q.; Yang, M.; Luan, D.; Li, N. W.; Yu, L.; Lou, X. W. Construction of Ni-Co-Fe Hydr(oxy)oxide@Ni-Co Layered Double Hydroxide Yolk-Shelled Microrods for Enhanced Oxygen Evolution. *Angewandte Chemie International Edition* **2022**, *61* (49), e202213049. DOI: <https://doi.org/10.1002/anie.202213049>.
- (16) Zhao, Y.; Lu, X. F.; Wu, Z.-P.; Pei, Z.; Luan, D.; Lou, X. W. Supporting Trimetallic Metal–Organic Frameworks on S/N-Doped Carbon Macroporous Fibers for Highly Efficient Electrocatalytic Oxygen Evolution. *Advanced Materials* **2023**, *35* (19), 2207888. DOI: <https://doi.org/10.1002/adma.202207888>.
- (17) Huang, Y.; Zhang, S. L.; Lu, X. F.; Wu, Z.-P.; Luan, D.; Lou, X. W. Trimetallic Spinel NiCo<sub>2</sub>-xFe<sub>x</sub>O<sub>4</sub> Nanoboxes for Highly Efficient Electrocatalytic Oxygen Evolution. *Angewandte Chemie International Edition* **2021**, *60* (21), 11841-11846. DOI: <https://doi.org/10.1002/anie.202103058>.
- (18) Lin, X.; Li, Q.; Hu, Y.; Jin, Z.; Reddy, K. M.; Li, K.; Lin, X.; Ci, L.; Qiu, H.-J. Revealing Atomic Configuration and Synergistic Interaction of Single-Atom-Based Zn-Co-Fe Trimetallic Sites for Enhancing Oxygen Reduction and Evolution Reactions. *Small* **2023**, *19* (30), 2300612. DOI: <https://doi.org/10.1002/sml.202300612>.
- (19) Nguyen, T. X.; Yang, K.-H.; Huang, Y.-J.; Su, Y.-H.; Clemens, O.; Xie, R.-K.; Lin, Y.-J.; Lee, J.-F.; Ting, J.-M. Anodic oxidation-accelerated self-reconstruction of tri-metallic Prussian blue analogue toward robust oxygen evolution reaction performance. *Chemical Engineering Journal* **2023**, 145831.

- (20) Karuppasamy, K.; Bose, R.; Velusamy, D. B.; Vikraman, D.; Santhoshkumar, P.; Sivakumar, P.; Alfantazi, A.; Kim, H.-S. Rational Design and Engineering of Metal–Organic Framework-Derived Trimetallic NiCoFe-Layered Double Hydroxides as Efficient Electrocatalysts for Water Oxidation Reaction. *ACS Sustainable Chemistry & Engineering* **2022**, *10* (45), 14693-14704. DOI: 10.1021/acssuschemeng.2c02830.
- (21) Li, J.; Hou, C.; Chen, C.; Ma, W.; Li, Q.; Hu, L.; Lv, X.; Dang, J. Collaborative Interface Optimization Strategy Guided Ultrafine RuCo and MXene Heterostructure Electrocatalysts for Efficient Overall Water Splitting. *ACS Nano* **2023**, *17* (11), 10947-10957. DOI: 10.1021/acsnano.3c02956.
- (22) Li, N.; Han, J.; Yao, K.; Han, M.; Wang, Z.; Liu, Y.; Liu, L.; Liang, H. Synergistic phosphorized NiFeCo and MXene interaction inspired the formation of high-valence metal sites for efficient oxygen evolution. *Journal of Materials Science & Technology* **2022**, *106*, 90-97. DOI: <https://doi.org/10.1016/j.jmst.2021.08.007>.
- (23) Yu, S.; Wu, Y.; Xue, Q.; Zhu, J.-J.; Zhou, Y. A novel multi-walled carbon nanotube-coupled CoNi MOF composite enhances the oxygen evolution reaction through synergistic effects. *Journal of Materials Chemistry A* **2022**, *10* (9), 4936-4943, 10.1039/D1TA10681C. DOI: 10.1039/D1TA10681C.
- (24) Yan, L.; Zhang, B. Rose-like, ruthenium-modified cobalt nitride nanoflowers grown in situ on an MXene matrix for efficient and stable water electrolysis. *Journal of Materials Chemistry A* **2021**, *9* (36), 20758-20765, 10.1039/D1TA05243H. DOI: 10.1039/D1TA05243H.
- (25) Zhao, K.; Ma, X.; Lin, S.; Xu, Z.; Li, L. Ambient Growth of Hierarchical FeOOH/MXene as Enhanced Electrocatalyst for Oxygen Evolution Reaction. *ChemistrySelect* **2020**, *5* (6), 1890-1895. DOI: <https://doi.org/10.1002/slct.201904506>.
- (26) Nazari, M.; Ghaemmaghami, M. Approach to Evaluation of Electrocatalytic Water Splitting Parameters, Reflecting Intrinsic Activity: Toward the Right Pathway. *ChemSusChem* **2023**, *16* (11), e202202126. DOI: <https://doi.org/10.1002/cssc.202202126>.
